# Supplementary material for: The rice zebra3 (z3) mutation disrupts citrate distribution and produces transverse dark-green/green variegation in mature leaves
Source: PubMed Central journal article supplement (PMC5756232; doi:10.1186/s12284-017-0196-8), 2018-01-05
Supplement: 12284_2017_196_MOESM2_ESM.pdf [file 12284_2017_196_MOESM2_ESM.pdf]

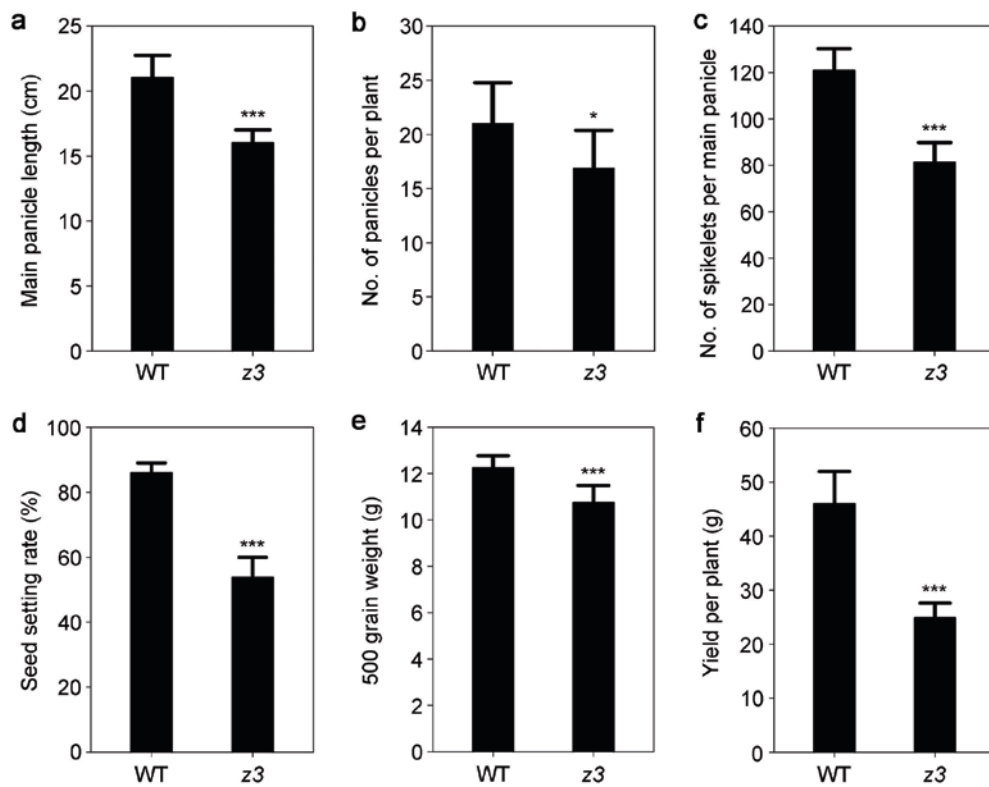

**Additional File 2: Fig. S2** Statistical analysis of agronomic traits in the z3 mutant.

**a–f** Agronomic traits were investigated between the WT and the z3 mutant plants grown under natural conditions. Investigated traits are as follows: **a** main panicle length, **b** number of panicles per plant, **c** number of spikelets per main panicle, **d** seed setting rate, **e** 500-grain weight, and **f** yield per plant. Ten plants were used to measure each trait. Values are shown as means. Error bars indicate SD. Student's *t*-test was performed for statistical analysis (\*  $P < 0.05$ , \*\*  $P < 0.01$ , \*\*\*  $P < 0.001$ ).
