# Supplementary material for: The rice zebra3 (z3) mutation disrupts citrate distribution and produces transverse dark-green/green variegation in mature leaves
Source: PubMed Central journal article supplement (PMC5756232; doi:10.1186/s12284-017-0196-8), 2018-01-05
Supplement: 12284_2017_196_MOESM4_ESM.pdf [file 12284_2017_196_MOESM4_ESM.pdf]

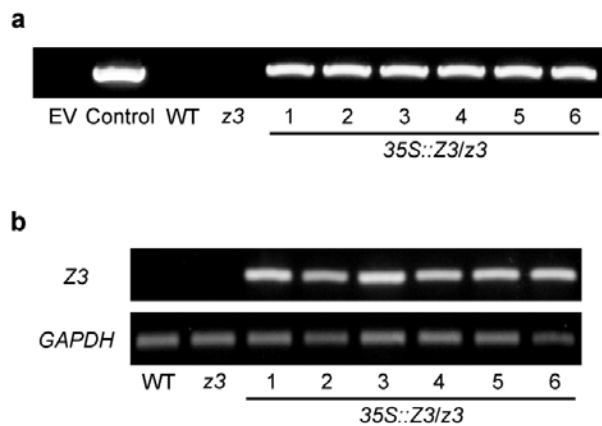

**Additional File 4: Fig. S4** Confirmation of the overexpression of *Z3* by the CaMV 35S promoter in six independent complementation lines.

**a** Genomic PCR analysis for confirmation of rice transformation. The genomic region between the vector and the *Z3* transgene was amplified in the transformed lines. All six independent lines were confirmed to be transformed. Primer information is listed in **Additional file 8: Table S1**. EV, empty vector; Control, vector used for transformation without the *Z3* gene. **b** The overexpression of *Z3* by the CaMV 35S promoter in six independent complementation lines. Primers were designed to amplify the transgene mRNA, and are listed in **Additional file 8: Table S1**. The *GAPDH* mRNA level was measured as a loading control.
