# Supplementary material for: The rice zebra3 (z3) mutation disrupts citrate distribution and produces transverse dark-green/green variegation in mature leaves
Source: PubMed Central journal article supplement (PMC5756232; doi:10.1186/s12284-017-0196-8), 2018-01-05
Supplement: 12284_2017_196_MOESM6_ESM.pdf [file 12284_2017_196_MOESM6_ESM.pdf]

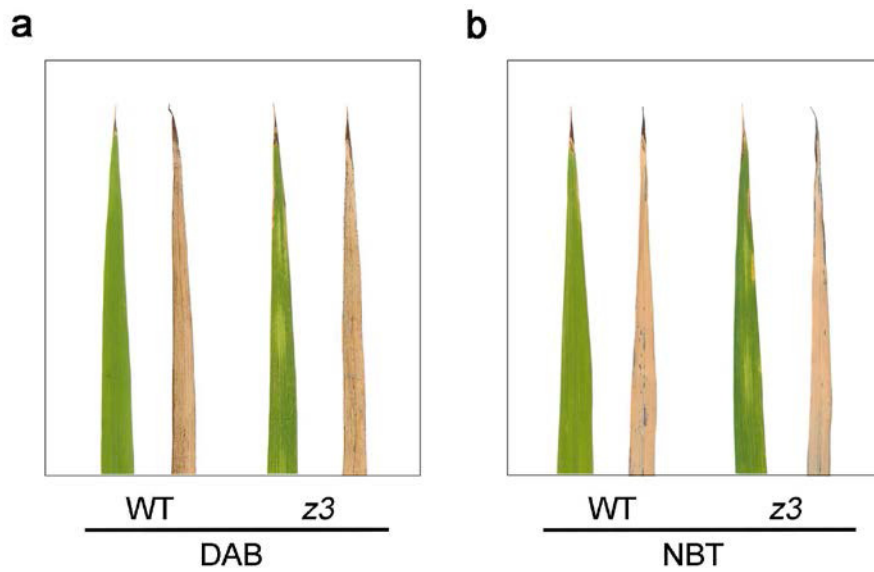

**Additional File 6: Fig. S6** Analysis of reactive oxygen species (ROS) in the *z3* mutant leaves.

**a-b** Hydrogen peroxide ( $H_2O_2$ ) and superoxide anion radicals ( $O_2^-$ ) in flag leaves of the WT and *z3* mutants at 160 DAS grown under natural long day conditions were visualized by staining with DAB (**a**) and NBT (**b**), respectively. Leaves before (left) and after (right) staining are shown.
