# Supplementary material for: The rice zebra3 (z3) mutation disrupts citrate distribution and produces transverse dark-green/green variegation in mature leaves
Source: PubMed Central journal article supplement (PMC5756232; doi:10.1186/s12284-017-0196-8), 2018-01-05
Supplement: 12284_2017_196_MOESM7_ESM.pdf [file 12284_2017_196_MOESM7_ESM.pdf]

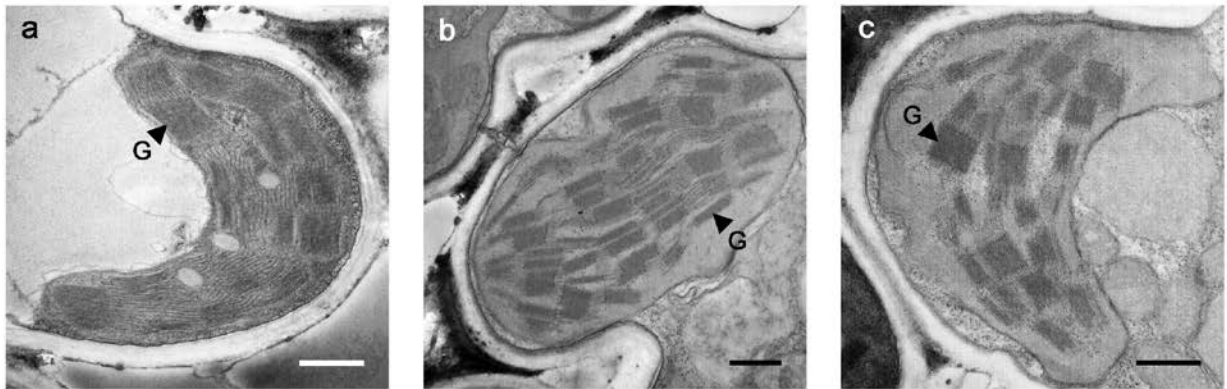

**Additional File 7: Fig. S7** Transmission electron microscopy analysis of chloroplasts in the *z3* mutant leaves.

**a-c** Chloroplasts in the green leaves of the WT (**a**) and in the dark-green (**b**) and green (**c**) sectors of the *z3* mutant leaves. Flag leaves of the 150-day-old WT and *z3* mutant grown under natural long day conditions were sampled for analysis. G, grana thylakoid. Scale bars = 0.5  $\mu\text{m}$ .
